**SIMULTANEOUS DELETION OF TRANSIENT RECEPTOR POTENTIAL VANILLOID 3 AND  
CACNA1H UNDERMINES  $CA^{2+}$  HOMEOSTASIS IN OOCYTES AND FERTILITY IN MICE**

Aujan Mehregan<sup>1#</sup>, Goli Ardestani<sup>1</sup>, Ingrid Carvacho<sup>2</sup>, Rafael Fissore<sup>1\*</sup>

<sup>1</sup> Department of Veterinary and Animal Sciences, University of Massachusetts Amherst, 661  
North Pleasant Street, Amherst, MA 01003, USA.

<sup>2</sup> Department of Biology and Chemistry, Faculty of Basic Sciences, Universidad Católica del  
Maule, 3480112 Talca, Chile.

<sup>#</sup>Present address: Department of Cellular and Molecular Medicine, KU Leuven, Herestraat  
49 – PB601, 3000 Leuven, Belgium

\*Author for correspondence (rfissore@vasci.umass.edu)

## ABSTRACT

1  
2 In mammals, calcium ( $\text{Ca}^{2+}$ ) influx fills the endoplasmic reticulum, from where  $\text{Ca}^{2+}$  is released  
3 following fertilization to induce egg activation. However, an incomplete index of the plasma  
4 membrane channels and their specific contributions that underlie this influx in oocytes and  
5 eggs led us to simultaneously knock out the transient receptor potential vanilloid, member 3  
6 (TRPV3) channel and the T-type channel,  $\text{Ca}_v3.2$ . Double knockout (dKO) females displayed  
7 subfertility and their oocytes and eggs showed significantly diminished  $\text{Ca}^{2+}$  store content and  
8 oscillations after fertilization compared to controls. We also found that the cell cycle stage  
9 during maturation determines the functional expression of channels whereby they show a  
10 distinct permeability to certain ions. In total, we demonstrate that TRPV3 and  $\text{Ca}_v3.2$  are  
11 required for initiating physiological oscillations and that  $\text{Ca}^{2+}$  influx dictates the periodicity of  
12 oscillations during fertilization. dKO gametes will be indispensable to identify the complete  
13 native channel currents present in mammalian eggs.

14

## INTRODUCTION

15 Mammalian egg activation is a widely researched field, as it is the first stage of embryo  
16 development. During this event, the egg is induced to undergo changes such as resuming and  
17 completing meiosis, remodeling its outer cortex to block polyspermy, reorganizing the  
18 cytoskeleton and meiotic spindle, undergoing pronuclear formation and DNA synthesis, and  
19 translating and changing maternal mRNA and protein levels to commence mitotic cycles  
20 (Horner and Wolfner, 2008; Florman and Fissore, 2015). These changes are commonly  
21 referred to as egg activation.

22

23 In this species, fertilization induces embryo development after the sperm fuses to a mature  
24 metaphase II (MII) oocyte (egg), and initiates a series of precise rises in the intracellular  
25 concentration of free calcium ( $[Ca^{2+}]_i$ ), known as oscillations. The oscillations are ultimately  
26 responsible for triggering embryonic development via modification of proteins that regulate  
27 the resumption and completion of meiosis (Miyazaki and Igusa, 1981; Ducibella et al., 2002;  
28 Ozil et al., 2005).  $Ca^{2+}$  oscillations rely on  $Ca^{2+}$  influx from the extracellular media to replenish  
29 the stores (Igusa et al., 1983; Wakai and Fissore, 2013). Currently, the molecule(s)/channel(s)  
30 responsible for this influx has not yet been completely established.

31

32 During maturation – the process initiated following the surge of luteinizing hormone (LH) –  
33 and prior to ovulation and fertilization, the oocyte undergoes a plethora of changes including  
34 the increase of  $Ca^{2+}$  store content ( $[Ca^{2+}]_{ER}$ ), which requires  $Ca^{2+}$  influx (reviewed in Wakai et  
35 al., 2011; Wakai et al., 2011; Whitaker, 2006). Previous studies have demonstrated that  
36  $[Ca^{2+}]_{ER}$  and  $Ca^{2+}$  influx are carefully regulated during maturation; while  $Ca^{2+}$  influx  
37 progressively decreases,  $[Ca^{2+}]_{ER}$  content increases (reviewed in Wakai et al., 2011). This strict

38 regulation is necessary because an excess of  $\text{Ca}^{2+}$  content and/or influx can predispose eggs  
39 or oocytes to parthenogenetic activation, fragmentation and/or apoptosis (Gordo et al., 2002;  
40 Ozil et al., 2005), whereas a deficit might impede cellular functions, including protein  
41 synthesis, completion of maturation, and initiation of embryonic development. Oocytes and  
42 eggs have several mechanisms to regulate changes in  $[\text{Ca}^{2+}]_i$ , including pumps, channels, and  
43 exchangers; the PM  $\text{Ca}^{2+}$ -ATPase (PMCA) and  $\text{Na}^+/\text{Ca}^{2+}$  exchangers extrude excess  $\text{Ca}^{2+}$ , while  
44 the sarco-endoplasmic reticulum  $\text{Ca}^{2+}$ -ATPases reuptake  $\text{Ca}^{2+}$  into the ER thereby refilling its  
45 stores (reviewed in Berridge et al., 2000; Bootman et al., 2001; Wakai et al., 2011). This  
46 complement of molecules is known as the  $\text{Ca}^{2+}$  toolkit, one that every cell type possesses to  
47 regulate  $\text{Ca}^{2+}$  and trigger crucial processes such as muscle contraction, exocytosis, and  
48 metabolism, among others (Berridge et al., 2003).

49

50 The identification of the channels responsible for  $\text{Ca}^{2+}$  homeostasis in mammalian oocytes  
51 and eggs is largely incomplete. Among the plasma membrane (PM) channels, the mammalian  
52 transient receptor potential (TRP) family of channels include six subfamilies and nearly 30  
53 human members that are expressed in multiple cell types and tissues (Wu et al., 2010). We  
54 have demonstrated the presence of two family members in oocytes and eggs including TRP  
55 Vanilloid, member 3 (TRPV3) (Carvacho et al., 2013). TRPV3 allows divalent cations such as  
56 strontium ( $\text{Sr}^{2+}$ ) and  $\text{Ca}^{2+}$  into cells and eggs, and importantly, it is essential for triggering  
57 parthenogenetic embryonic development using  $\text{Sr}^{2+}$  stimulation, though it is not required for  
58 normal fertility, as null females are fertile (Cheng et al., 2010; Carvacho et al., 2013). Another  
59 channel involved in  $\text{Ca}^{2+}$  homeostasis in oocytes and eggs is the T-type voltage-gated calcium  
60 channel,  $\text{Ca}_v3.2$  (Bernhardt et al., 2015), although *Cacna1h* null females are only mildly  
61 subfertile, which is consistent with the knowledge that changes in membrane potential during

62 mouse fertilization are minor, and at the resting potential of oocytes and eggs a limited  
63 number of  $Ca_v$  channels are open (Igusa et al., 1983; Jaffe and Cross, 1984).

64

65 TRPV3 and  $Ca_v3.2$  channels are differentially expressed in oocytes and eggs. The functional  
66 expression of TRPV3 is nearly absent at the beginning of maturation at the germinal vesicle  
67 stage (GV), but rises steadily during maturation with its maximal expression being at the MII  
68 stage (Carvacho et al., 2013). On the other hand, the expression levels of  $Ca_v$  channels during  
69 oocyte maturation is unknown, although early electrophysiological recordings indicated that  
70 GV oocytes display greater current amplitude than ovulated eggs; however, the electrical  
71 properties of the channels expressed in GV oocytes were different from the protein expressed  
72 in eggs. Moreover, the total current was not corrected by cell area, thus it is not clear whether  
73 the increased expression observed of the channel at GV oocytes is accurate (Peres, 1986;  
74 Peres, 1987). Why these channels are differentially expressed and/or regulated during oocyte  
75 maturation requires further investigation.

76

77 Thus, despite identification of some channels in mammalian oocytes and eggs, the complete  
78 set of channels responsible for filling the internal  $Ca^{2+}$  stores and supporting oscillations has  
79 not been found. Furthermore, the ability to accurately probe the effects of channel inhibition  
80 on  $Ca^{2+}$  homeostasis in mouse eggs is hindered by the lack of specific and known  
81 pharmacological agents as well as by the lack of specific antibodies. Therefore, evaluation of  
82  $Ca^{2+}$  store content,  $Ca^{2+}$  responses to agonists and fertilization in oocytes and eggs null for  
83 specific channel(s) is a necessary approach to identify the channel(s) that underlie  $Ca^{2+}$   
84 homeostasis in these cells. In addition, these null oocytes and eggs will be an important  
85 platform to perform electrophysiological studies to identify the full complement of channel(s)

86 as well as to assess the specificity of commonly used pharmacological inhibitors. To these  
87 ends, here we describe the generation of mice lacking both *Trpv3* and *Cacna1h*, and show  
88 that these females are subfertile compared to those lacking only one of the two channels.  
89 Most importantly, we found that oocytes and eggs of these dKO mice exhibit altered  $\text{Ca}^{2+}$   
90 homeostasis and mount short-lived  $\text{Ca}^{2+}$  oscillations with reduced periodicity. Our findings  
91 therefore reveal insights into the  $\text{Ca}^{2+}$  channels required to initiate and maintain fertilization  
92 induced  $[\text{Ca}^{2+}]_i$  oscillations in the mouse and possibly in other mammals.

93

## RESULTS

94 Double null mice lacking *Trpv3* and *Cacna1h* genes are subfertile.

95 Our first goal was to generate a dKO mouse line lacking the *Trpv3* and *Cacna1h* genes. The  
96 rationale for this stemmed from the establishment of the single KO lines for these genes  
97 displaying little effect on  $\text{Ca}^{2+}$  homeostasis or influx in oocytes and eggs (Carvacho et al., 2013;  
98 Bernhardt et al., 2015). Besides examining how the absence of these channels would affect  
99 fertility, the simultaneous elimination of these channels would facilitate performing  
100 electrophysiological recordings to identify any remaining channel(s). Our ultimate goal is to  
101 pinpoint the channel(s) responsible for  $\text{Ca}^{2+}$  influx during oocyte maturation, fertilization and  
102 egg activation.

103

104 To obtain the dKO mouse line, single knockout mice were bred to generate the initial pool of  
105 double heterozygotes. Males and females of this generation were bred to generate the parent  
106 generation of dKO and wildtype (WT) mice that were used in the following studies. Germline  
107 deletion of the *Trpv3* and *Cacna1h* alleles was confirmed via PCR analysis using ear tissue DNA  
108 prepared from 21 day-old mice (Supplementary Fig. S1). We first investigated the possibility  
109 of obvious differences in ovarian size, ovulation rates, and on the rates of *in vitro* maturation.  
110 We found that there were no significant differences in ovarian weight and number of eggs  
111 ovulated post hormone stimulation between the groups (Supplementary Fig. S2A-B). Ovarian  
112 shape and size were also similar between the two groups (Supplementary Fig. S2C). It is worth  
113 noting that these evaluations were performed in young, 4-6-week-old, animals, which as  
114 shown in the subsequent figures, have fewer defects in fertility. There was also no delay in  
115 any stage of maturation in the dKO oocytes compared to rates observed in control oocytes  
116 when GV oocytes from WT and dKO mice were matured under *in vitro* conditions

117 (Supplementary Fig. S2D). This data reinforces the notion that TRPV3 and Ca<sub>v</sub>3.2 channels are  
118 functionally present in mouse oocytes and eggs, but are not required for oocyte maturation  
119 or egg activation, at least in young female mice.

120

121 We then sought to evaluate the fertility of the females lacking the *Trpv3* and *Cacna1h* genes.

122 The single knockout lines, *Trpv3*<sup>-/-</sup> and *Cacna1h*<sup>-/-</sup>, respectively, have previously been shown

123 to be viable and fertile (Cheng et al., 2010; Chen et al., 2003; Carvacho et al., 2013; Bernhardt

124 et al., 2015). WT mice were used as controls. Four females from each WT and dKO line were

125 bred with five males of the same genotype for 36 weeks; *Trpv3*-knockout (V3KO) and

126 *Cacna1h*-knockout (t-knockout; tKO) mating studies were performed with three pairs of mice.

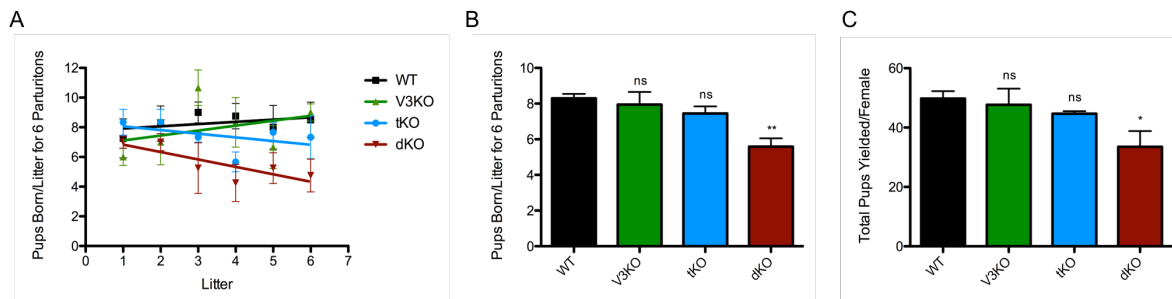

**Figure 1. dKO females display subfertility.**

A-B: Number of pups born per litter for six parturitions. Linear regression in A was applied using data from each individual mating pair per genotype (WT n=4, V3KO n=3, tKO n=3, dKO n=4). Error bars represent standard error. B: Quantification of A, where mean ± S.E.M. for each genotype was as follows WT: 8.29 ± 0.62; V3KO: 7.94 ± 1.7; tKO: 7.44 ± 0.98; dKO: 5.58 ± 1.16. p (WT:dKO) = 0.0115 and p (WT:V3KO) or (WT:tKO) > 0.05. C: Total number of pups yielded per female. Mean ± S.E.M. for each genotype: WT: 49.8 ± 5.06; V3KO: 47.7 ± 9.45; tKO: 44.7 ± 1.53; dKO: 33.5 ± 10.7. p (WT:dKO) = 0.037 and p (WT:V3KO) or (WT:tKO) > 0.05. All means ± S.E.M. were calculated using column statistics in Prism GraphPad for each genotype.

127

128 Data from the first six litters was used for analysis. Our results show that the dKO line

129 produced fewer numbers of pups, and the number of pups per litter decreased significantly

130 by, or after, the third parturition (dKO: 5.58 ± 1.16 versus WT: 8.29 ± 0.62; p = 0.0115) (Fig.

131 1A). In contrast, V3KO females yielded a similar number of pups per litter compared to WT



132 females; while tKO females yielded fewer pups per litter though non-significant compared to  
133 wildtype females (V3KO:  $7.94 \pm 1.7$ ; tKO:  $7.44 \pm 0.98$ ;  $p > 0.05$  for both genotypes) (Fig. 1B).  
134 Similarly, the total number of pups yielded per female in each genotype after six parturitions  
135 was decreased by about 33% in the dKO line (dKO:  $33.5 \pm 10.7$  versus WT:  $49.8 \pm 5.06$ ,  $p =$   
136  $0.037$ ) (Fig. 1C). Lastly, we examined if there was a difference in the interval between litters.  
137 While dKO mice displayed a delay in this parameter, it remained statistically insignificant. It is  
138 also worth noting that after the third parturition in dKO females, and with each successive  
139 parturition, the number of neonatal deaths became prominent, with about 40-80% of pups  
140 dying per litter (data not shown). The total number of pups born from all females in each  
141 group varied significantly with a total of 191 pups yielded from dKO females versus 284 pups  
142 yielded from the controls (Supplementary Table S1). These results demonstrate that these  
143 channels are not required for fertilization nor to support embryo development to term,  
144 although they seem necessary for full fertility.

145

#### 146 TRPV3 and $Ca_v3.2$ currents are absent in dKO females.

147 We used whole-cell patch clamp techniques to record and determine TRPV3 and T-type  
148 channel properties in MII eggs. Previous data established the expression of TRPV3 channels  
149 in mouse eggs and its potentiation by 2-Aminoethoxydiphenyl borate (2-APB) (Carvacho et  
150 al., 2013). 2-APB, besides being a nonspecific blocker of  $Ca^{2+}$  channels, was also identified as  
151 an inhibitor of  $IP_3R1$  (Maruyama et al., 1997). However, in eggs and at the concentration used  
152 here, 2-APB acts selectively on TRPV3 channels (Lee et al., 2016). In response to a voltage  
153 ramp (Fig. 2A), addition of  $200\mu M$  2-APB evoked an outwardly rectifying current with  
154 properties characteristic of TRPV3 (Hu, H. Z. et al., 2004), and congruent with Carvacho et al.  
155 (2013) (Fig. 2B). The current was present in WT eggs with a mean of  $17.7 \pm 4.2$  pA/pF at +80

156 mV, but absent in dKO eggs ( $2.94 \pm 1.5$  pA/pF), which is comparable to basal currents. The

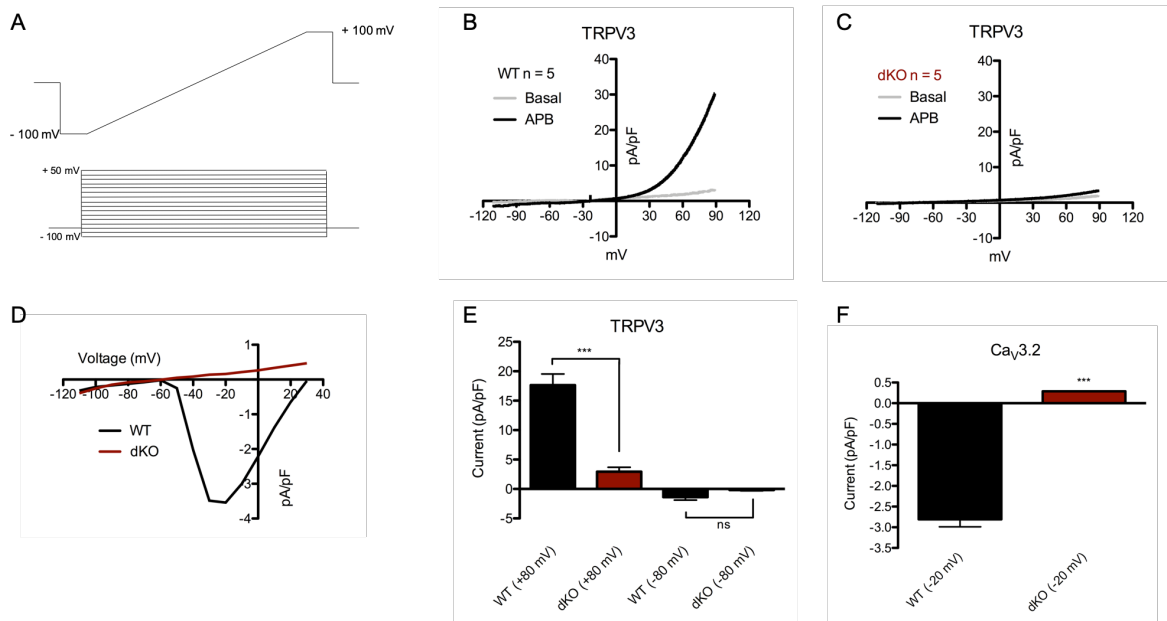

**Figure 2. TRPV3 and Ca<sub>v</sub>3.2 currents are absent in dKO eggs.**

A, Top: ramp protocol from -100 mV to +100 mV to measure TRPV3 current (HP: 0 mV). Bottom: step protocol from -100 mV to +50 mV, every 10 mV to measure Ca<sub>v</sub> channel activity (HP: -80 mV). B-C: Current-voltage (I-V) relationships in response to a ramp in the absence (grey trace) and presence (black trace) of 200  $\mu$ M 2-APB. B: WT mean, n = 5 per trace. C: dKO mean, n = 5 per trace. D: I-V relationship in response to voltage step protocol. WT mean (black trace, n = 5) and dKO mean (red trace, n = 4). E: Averaged TRPV3 current responses in response to 200  $\mu$ M 2-APB analyzed at +80 mV and -80 mV for WT (black bars; +80 mV:  $17.7 \pm 4.2$  pA/pF; -80 mV:  $-1.38 \pm 1$  pA/pF) and dKO eggs (red bars; +80 mV:  $2.94 \pm 1.5$  pA/pF ( $p < 0.0001$ ); -80 mV:  $-0.198 \pm 0.25$  pA/pF ( $p =$  not significant)). F: Averaged Ca<sub>v</sub>3.2 current at -20 mV in WT eggs ( $-2.81 \pm 0.18$  pA/pF) versus dKO eggs ( $0.29 \pm 0.01$  pA/pF;  $p < 0.0001$ ).

157

158 inward current in both genotypes was statistically insignificant in the presence and absence

159 of 2-APB. (Fig. 2B-C, respectively); thus, confirming the identity and absence of the channel.

160 Next, we performed whole-cell patch clamp recordings to elicit Ca<sub>v</sub>3.2 currents. In response

161 to a step protocol from -100 mV to +50 mV (Fig. 2A), we observed an I-V curve that agrees

162 with T-type calcium channel activity. The peak of the currents in 20 mM extracellular Ca<sup>2+</sup> was

163 at -20 mV (Fig. 2D), which was consistent with previous reports (Bernhardt et al., 2015; Day

164 et al., 1998; Peres, 1987). This current was absent in dKO eggs (WT:  $-2.81 \pm 0.18$  pA/pF versus

165 dKO:  $0.29 \pm 0.01$  pA/pF). To summarize, we show averaged current amplitudes at +80 mV and

166 -80 mV (Fig. 2E), and at -20 mV (Fig. 2F). To confirm that dKO oocytes were truly null for both  
167 channels, we measured  $\text{Ca}_v3.2$  current, and subsequently, TRPV3 current in the same egg  
168 versus independent measurements in separate eggs, and observed absence of these currents  
169 in the dKO eggs (Supplementary Fig. S3).

170

171  $\text{Ca}^{2+}$  stores are diminished in dKO females.

172 The subfertility of the dKO mice suggested that the oocytes may have impaired  $\text{Ca}^{2+}$   
173 homeostasis parameters. It has been previously documented that  $[\text{Ca}^{2+}]_{\text{ER}}$  increases  
174 throughout maturation, which effectively plays a role in the preparation of the oocyte for  
175 fertilization (Jones et al., 1995; Wakai et al., 2011; Wakai and Fissore, 2013). Little is known  
176 about the mechanism by which oocytes accumulate  $\text{Ca}^{2+}$  in the stores during this process,  
177 although results from our laboratory suggest that the main source of increased  $[\text{Ca}^{2+}]_{\text{ER}}$  is due  
178 to influx of external  $\text{Ca}^{2+}$  (Wakai et al., 2013).  $\text{Ca}_v3.2$  channels have also been shown to  
179 contribute to the increase in  $[\text{Ca}^{2+}]_{\text{ER}}$  during oocyte maturation (Bernhardt et al., 2015),  
180 although the effects of TRPV3 channels were not examined. Nevertheless, given that TRPV3  
181 and  $\text{Ca}_v3.2$  are important  $\text{Ca}^{2+}$  influx channels in oocytes, we hypothesized that the  $[\text{Ca}^{2+}]_{\text{ER}}$   
182 would be greatly diminished in dKO eggs.

183

184 To test this hypothesis, we directly examined in *in vivo* matured eggs the  $[\text{Ca}^{2+}]_{\text{ER}}$  using  
185 Thapsigargin (TG), a sarcoendoplasmic reticulum  $\text{Ca}^{2+}$  ATPase (SERCA) inhibitor. SERCA is the  
186 pump that fills the ER, the major  $\text{Ca}^{2+}$  reservoir in the cell (Fig. 3A-B) (Jones et al., 1995; Kline  
187 and Kline, 1992; reviewed in Berridge, 2002). We observed a significant decrease in  $[\text{Ca}^{2+}]_{\text{ER}}$   
188 levels between the dKO (mean area of  $1.72 \pm 0.16$ ,  $n = 18$ ) and WT oocytes (mean area of  $3.69$   
189  $\pm 0.22$ ,  $n = 18$ ;  $p < 0.0001$ ); as estimated by quantification of the area under the curve (AUC)

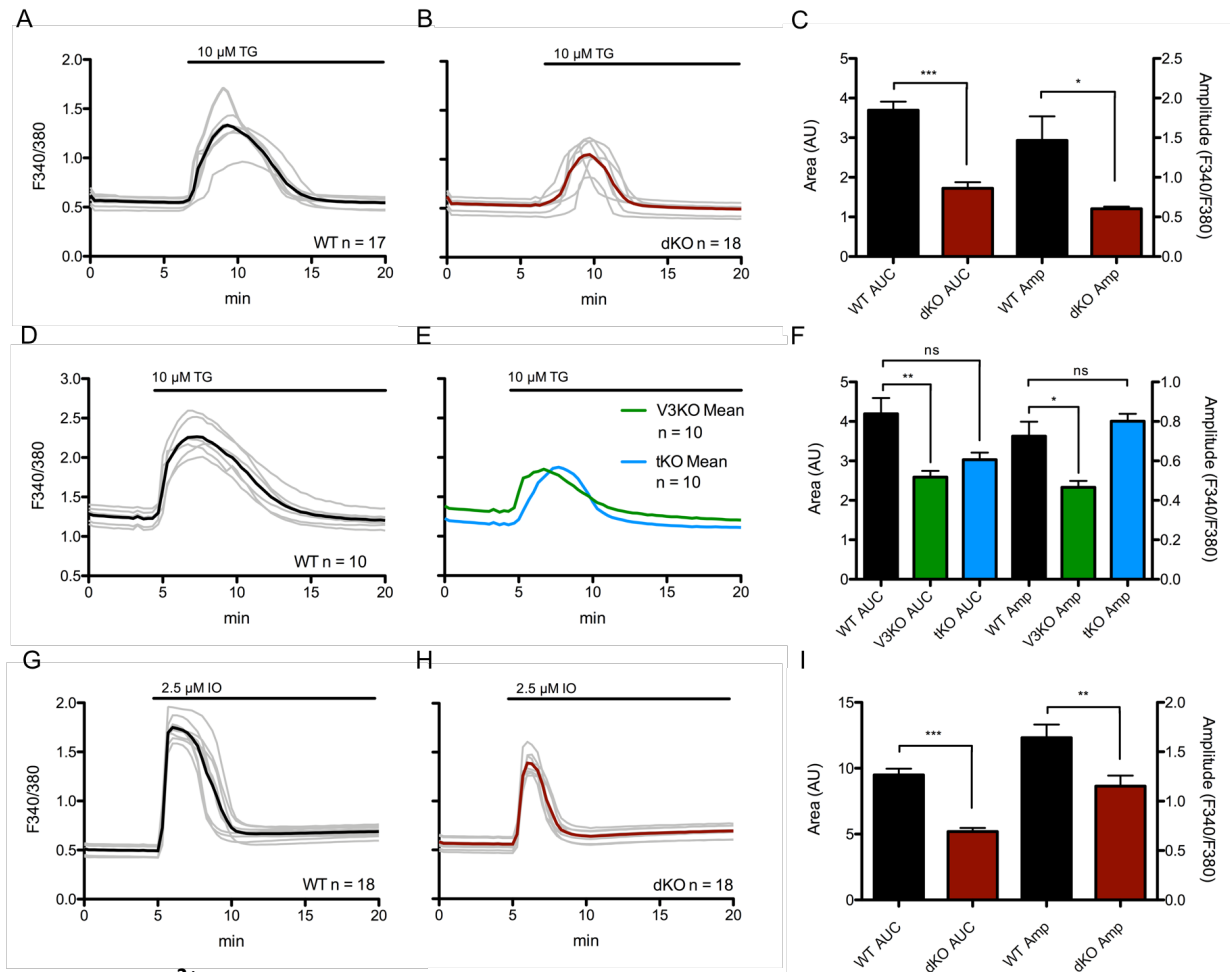

190

191 (Fig. 3C; left axis) and relative maximum amplitude (Fig. 3C; right axis). In the case of single

192 channel KOs, while both parameters were also reduced, the reduction was only significant for

193 V3KO oocytes (Fig. 3D-F). In the absence of extracellular Ca<sup>2+</sup>, the addition of TG partially

194 empties the ER, and this promotes  $\text{Ca}^{2+}$  influx to refill the stores when extracellular  $\text{Ca}^{2+}$  is  
195 added back to the media. We tested the eggs' ability to influx  $\text{Ca}^{2+}$  after TG by adding 2 mM  
196  $\text{CaCl}_2$ . Notably, there was no significant difference in  $\text{Ca}^{2+}$  influx capability between the WT  
197 and dKO groups (data not shown).

198

199 Next, we used a  $\text{Ca}^{2+}$  ionophore, Ionomycin (IO), to empty all  $\text{Ca}^{2+}$  stores in the cell (Fig. 3D-  
200 E). By analyzing the same parameters as above, we observed that the total  $\text{Ca}^{2+}$  content, AUC,  
201 was decreased by almost half in dKO mice ( $5.29 \pm 0.22$ ,  $n = 18$ ) compared to the control, WT  
202 mice ( $9.31 \pm 0.54$ ,  $n = 18$ ;  $p < 0.0001$ ) (Fig. 3F, left axis) as was the maximum amplitude (Fig.  
203 3F, right axis). Collectively, these results suggest that oocytes null for two  $\text{Ca}^{2+}$  influx channels  
204 can still maintain, but to a lesser degree,  $[\text{Ca}^{2+}]_{\text{ER}}$  levels during maturation and in MII eggs,  
205 and therefore that TRPV3 and  $\text{Ca}_v3.2$  channels are required to obtain a full amount of  $[\text{Ca}^{2+}]_{\text{ER}}$ .

206

207  $\text{Sr}^{2+}$  influx and 2-APB responses are abolished in dKO oocytes and eggs.

208  $\text{Sr}^{2+}$  is a useful method to induce artificial egg activation leading to parthenogenesis in rodent  
209 eggs. In MII eggs, Carvacho et al. demonstrated that TRPV3 channels mediate  $\text{Sr}^{2+}$  influx  
210 (2013). In a subsequent study, Carvacho et al. demonstrated that  $\text{Sr}^{2+}$  influx occurred through  
211 a different channel(s) at the GV stage, as oscillations persisted in V3KO GV oocytes (2016).  
212 We therefore tested if exposing WT and dKO GV oocytes and eggs to 10 mM  $\text{SrCl}_2$  induced  
213 oscillations. We found that  $\text{Sr}^{2+}$  failed to induce oscillations in dKO MII eggs, whereas the WT  
214 eggs showed robust responses (Fig. 4A-B). Further, when eggs were incubated in 10 mM  $\text{SrCl}_2$ -  
215 containing media for two hours then washed into culture media and evaluated for egg  
216 activation, dKO eggs did not show any signs of activation such as extrusion of the 2<sup>nd</sup> polar  
217 body, pronucleus formation or cleavage, whereas controls showed complete egg activation

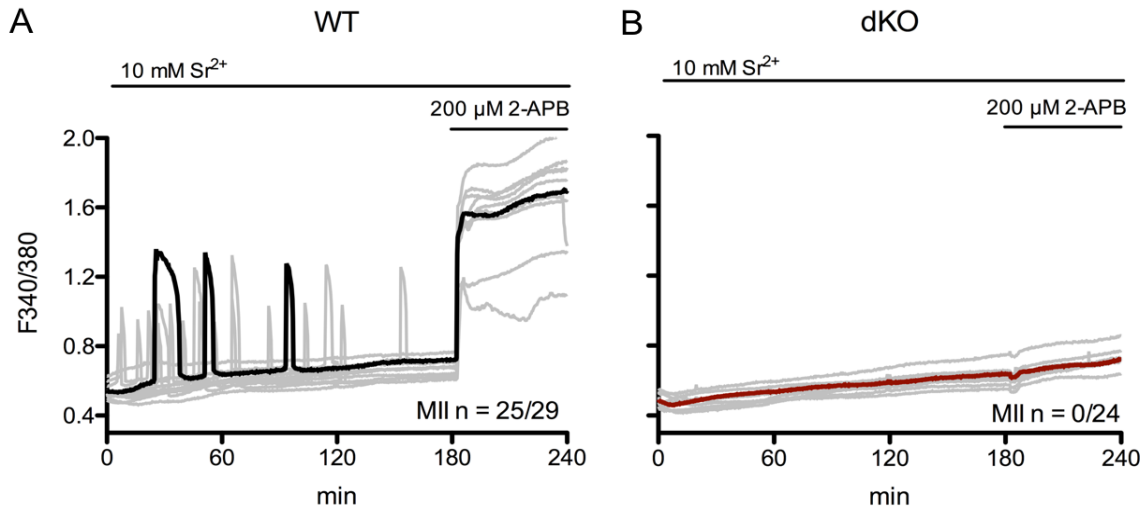

**Figure 4. dKO eggs lacking TRPV3 and Ca<sub>v</sub>3.2 channels do not support Sr<sup>2+</sup>-induced oscillations.**

A-B: Oscillations induced in MII eggs by exposure to 10 mM SrCl<sub>2</sub>. A: Black trace shows representative WT egg displaying 3-4 oscillations in 60 minutes (n = 25/29) versus B: red trace, which shows no response (n = 0/24). 200 μM 2-APB was applied to media at the end of the experiment.

218

219 (data not shown). Another way to test for the absence of TRPV3 is by examining the response

220 to 2-APB. Remarkably, 2-APB potentiates TRP Vanilloid channels, members 1-3, and is the

221 most used activator of TRPV3 (Chung et al., 2004; Hu, H. Z. et al., 2004; Hu, H. et al., 2009).

222 Here, we show that at 200 μM, 2-APB does not induce a Ca<sup>2+</sup> rise in the dKO eggs, but it does

223 in WT eggs (Fig. 4A-B). This data confirms and reinforces the finding that 2-APB induces a Ca<sup>2+</sup>

224 rise in eggs through the TRPV3 channel and that our dKO mice lack TRPV3.

225

226 The absence of Ca<sub>v</sub>3.2 is harder to test without electrophysiology, as there are no specific

227 agonists for these channels. Nevertheless, unpublished results from our laboratory suggested

228 that Ca<sub>v</sub>3.2 may be an important mediator of Sr<sup>2+</sup> influx at the GV stage. This is consistent

229 with previously shown results where 10 mM SrCl<sub>2</sub> exposure at the GV stage elicited

230 spontaneous and irregular rises in WT and V3KO oocytes (Supplementary Fig. S4A; Carvacho

231 et al., 2016). Importantly, we show here that in dKO oocytes, SrCl<sub>2</sub> induced responses were

232 largely absent (Supplementary Fig. S4B), demonstrating for the first time that  $Ca_v3.2$  channels  
233 underlie most of the  $Sr^{2+}$  influx in GV stage oocytes. Together, our results show that dKO mice  
234 lack functional expression of TRPV3 and  $Ca_v3.2$  channels and that their combined expression  
235 in oocytes ensures the influx of divalent cations throughout maturation.

236

237  $Ca^{2+}$  influx is diminished post-fertilization in dKO eggs.

238 The introduction of PLC $\zeta$  following sperm-egg fusion is thought to trigger the fertilization-  
239 associated  $[Ca^{2+}]_i$  oscillations responsible for egg activation (Saunders et al., 2002). As a  
240 surrogate of fertilization, we tested the ability of the dKO eggs to mount  $Ca^{2+}$  oscillations  
241 following injection of PLC $\zeta$  cRNA (Parrington et al., 1999; reviewed in Swann et al., 2006;  
242 Parrington et al., 2007). As shown, the time to initiation of oscillations was longer and the  
243 mean number of  $Ca^{2+}$  transients in the first 180 minutes was lower for dKO eggs ( $2.15 \pm 0.18$ )  
244 versus control eggs ( $4.78 \pm 0.17$ ;  $p \leq 0.0001$ ) (Fig. 5A-C). tKO eggs displayed no significant  
245 difference in the frequency of oscillations ( $4.55 \pm 0.55$ ) compared to WT eggs (Fig. 5D).  
246 Furthermore, approximately only half of the dKO injected eggs mounted oscillations  
247 compared to 100% of the injected control eggs (Fig. 5A-C). Previous results with V3KO mice  
248 also showed responses comparable to controls (Carvacho et al., 2013). Collectively, we  
249 observed that the diminution of all parameters analyzed suggests that dKO eggs' inability to  
250 influx the necessary amount of  $Ca^{2+}$  to support the filling and refilling of the ER undermines  
251 the ability to initiate and maintain timely oscillations (Fig. 5E-G).

252

253 We next evaluated whether subsequent  $[Ca^{2+}]_i$  rises in PLC $\zeta$  cRNA injected eggs were  
254 comparable between dKO vs. WT eggs. We hypothesized that significant differences in certain  
255 parameters such as rise time and/or amplitude could suggest additional effects on the

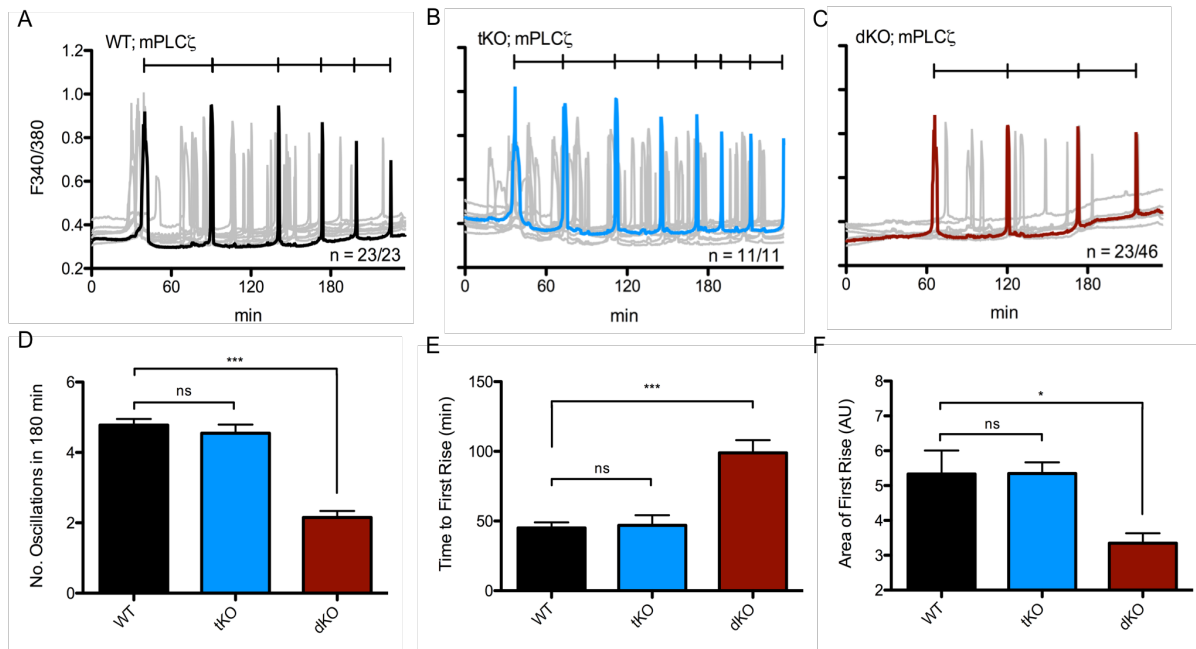

**Figure 5. PLCζ cRNA-initiated oscillations are diminished post-PLCζ cRNA activation.**

Oscillations induced by microinjection of 0.01 μg/μL mouse PLCζ cRNA in WT eggs (A, n = 23) displaying  $4.78 \pm 0.17$  oscillations in 180 minutes vs. tKO eggs (B, n = 11) displaying  $4.55 \pm 0.25$  oscillations vs. dKO eggs (C, n = 46) displaying  $2.15 \pm 0.18$  oscillations. Representative trace in black (A), blue (tKO), or red (dKO), individual traces in grey. D: Summary of parameters measured. p (WT:dKO) < 0.0001 and p (WT:tKO) was not significant. E: Time to reach first rise.  $x_0$  was start time of monitoring,  $x_f$  was 1<sup>st</sup> point before inflection of first rise. p (WT:dKO) < 0.0001; p (WT:tKO) > 0.05. F: Area under the curve of the first rise. AUC was calculated via the integral of the first transient from  $x_1$  (first point of inflection) to  $x_2$  (last point before return to baseline). All measurements are represented as mean ± S.E.M. of every individual egg per genotype.

256

257 function of IP<sub>3</sub>R1s. To accomplish this, we examined the rise time of the third Ca<sup>2+</sup> transient

258 by measuring the slope between the first point of persistent increase in baseline Ca<sup>2+</sup> until

259 the value before reaching maximum amplitude (Deguchi et al., 2000). This parameter was not

260 significant between groups (Supplementary Fig. S5A). Further, to rule out that the longer

261 intervals in dKO eggs were due to reduced Ca<sup>2+</sup> influx and not to the timing of injection or

262 inability of dKO eggs to translate the cRNA, we quantified in WT and dKO eggs the fluorescent

263 signal induced by injection of a cRNA encoding for a fluorescently tagged calcium-calmodulin

264 kinase (CaMKII); this cRNA is expressed quickly and its accumulation does not cause cell cycle

265 progression. We observed similar intensities at each time point in both groups



266 (Supplementary Fig. S5B-C) indicating that dKO eggs are capable of efficiently translating  
267 injected cRNAs.

268

269 To extend the PLC $\zeta$  cRNA results, we compared Ca<sup>2+</sup> responses induced by fertilization using  
270 *in vitro* fertilization (IVF). As noted, TRPV3 channels appear unnecessary for the maintenance  
271 of fertilization-induced Ca<sup>2+</sup> oscillations (Carvacho et al., 2013), and to a large extent a similar  
272 effect was observed for *Cacna1h*<sup>-/-</sup> mice (Bernhardt et al., 2015 and data in this manuscript).

273 Nevertheless, we observed that WT eggs showed Ca<sup>2+</sup> oscillations with normal frequency (Fig.

274 6A), whereas the frequency of oscillations in dKO eggs was substantially lower (Fig. 6B) with

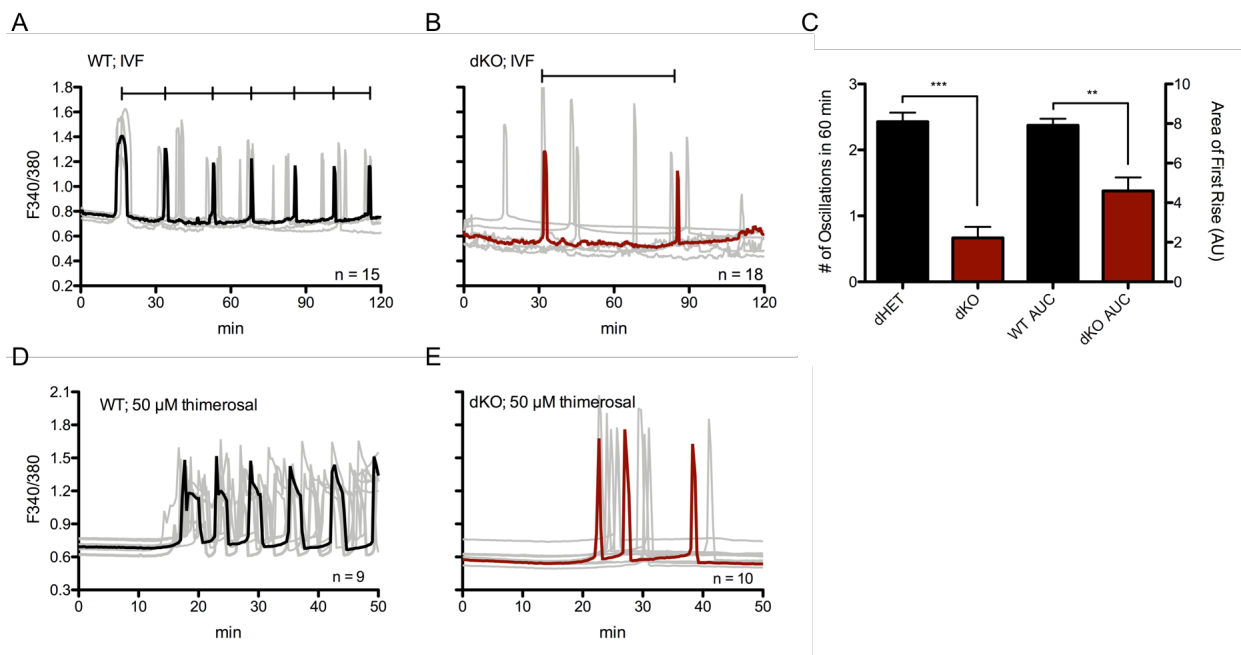

**Figure 6. The absence of TRPV3 and Ca<sub>v</sub>3.2 channels significantly affect the pattern of Ca<sup>2+</sup> oscillations post-fertilization or following addition of thimerosal.**

A: Oscillations induced by IVF in WT eggs (representative black trace with individual responses in grey traces; n = 15) who display 2.43 ± 0.14 oscillations in 60 minutes versus dKO eggs (B; n = 18) who display 0.667 ± 0.17 oscillations. C: Summary of parameters measured. Left y-axis: number of oscillations in 60 min, p < 0.0001. Right y-axis: area under the curve of first rise, p = 0.002. Bars represent mean ± S.E.M. of all traces per genotype. Statistical significance was calculated using two-tail t-test. D-E: 50 μM thimerosal induced fewer Ca<sup>2+</sup> responses in dKO eggs (E, representative red trace, n = 10) vs. WT eggs (D, representative black trace, n = 9).

275

276 mean frequencies of 2.43 ± 0.14 oscillations per hour versus 0.667 ± 0.17 oscillations per

277 hour, respectively ( $p \leq 0.0001$ ). We also quantified the stark difference in the area under the  
278 first transient, and observed that this parameter is significantly reduced in dKO eggs ( $7.92 \pm$   
279  $0.33$  vs.  $4.6 \pm 0.68$  AU) (Fig. 6C). The total number of  $\text{Ca}^{2+}$  transients was also decreased in the  
280 dKO eggs compared to the WT eggs (data not shown). Additionally, preliminary results  
281 following pre-implantation embryo development did not show any significant differences  
282 between the two groups (data not shown).

283

284 Lastly, we tested the relative sensitivity of dKO eggs to oscillate via chemical stimulation by  
285 monitoring WT and dKO eggs in media supplemented with  $50 \mu\text{M}$  or  $100\mu\text{M}$  thimerosal.  
286 Thimerosal is an oxidizing agent that is thought to enhance the sensitivity of calcium induced  
287 calcium release (CICR) and  $\text{IP}_3\text{Rs}$  (Cheek et al., 1993; Swann, 1991), although its impact on PM  
288  $\text{Ca}^{2+}$  channels was never tested. We show here that in response to thimerosal, dKO eggs  
289 mounted oscillations with irregular patterns and with lower frequency than controls,  $3.2 \pm$   
290  $0.43$  vs.  $6.6 \pm 0.45$  rises in 60 min, respectively (Fig. 6D-E;  $p < 0.05$ ). These data suggest that  
291 TRPV3 and  $\text{Ca}_v3.2$  channels are not required for the initiation of fertilization or chemically  
292 induced oscillations, but remarkably affect the periodicity of such oscillations, and are  
293 therefore physiological contributors to the  $[\text{Ca}^{2+}]_i$  responses during mouse fertilization.

294

295 A TRPM7-like channel is functional in eggs of dKO mice.

296 The fact that the deletions of *Trpv3* and *Cacna1h* did not fully prevent the filling of  $[\text{Ca}^{2+}]_{\text{ER}}$   
297 and that fertilization induced oscillations were slowed but not prevented suggests the  
298 presence of  $\text{Ca}^{2+}$  influx by another channel(s). TRP Melastatin 7 (TRPM7) presence has been  
299 identified using electrophysiology (Carvacho et al., 2016), and it is functionally expressed in  
300 oocytes. This unique chanzyme is modulated at different levels by the divalent cation

301 magnesium ( $Mg^{2+}$ ) (Bates-Withers et al., 2011). For example, free intracellular  $Mg^{2+}$  affects  
302 the PM-associated domain, whereas  $Mg^{2+}$ -ATP regulates the kinase domain, and high

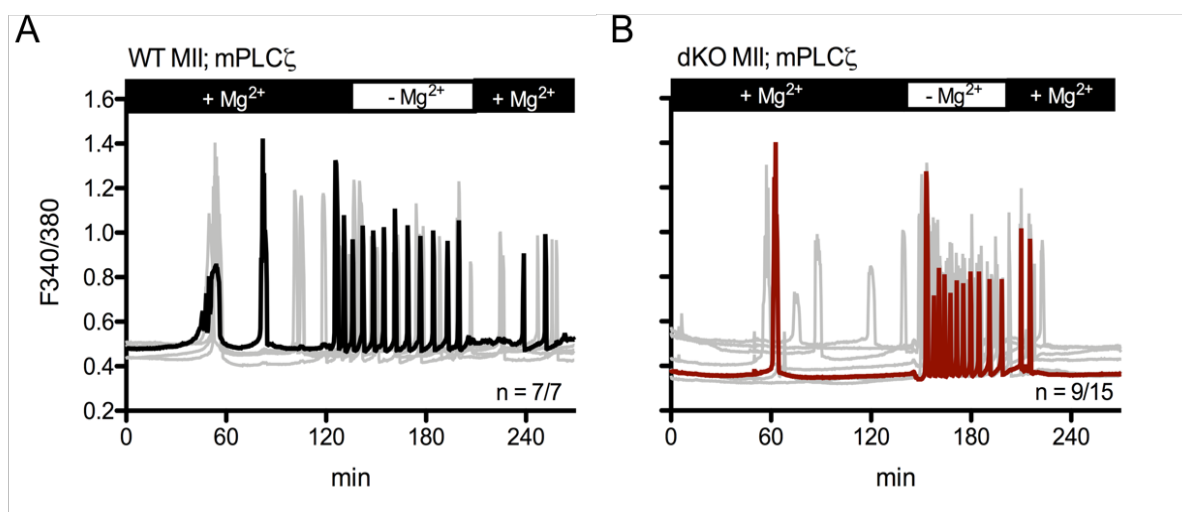

**Figure 7. External  $Mg^{2+}$  modifies PLC $\zeta$  induced  $Ca^{2+}$  oscillations in eggs.**

A-B: Oscillations induced after PLC $\zeta$  cRNA microinjection in MII eggs. A: WT mean (black trace), n = 7/7. D: dKO mean (red trace), n = 9/15. Individual responses are shown as grey traces. Monitoring was continuous throughout changes in  $Mg^{2+}$  concentrations.

303

304 extracellular concentrations of  $Mg^{2+}$  affect channel permeability, effectively blocking the  
305 channel (Bates-Withers et al., 2011). Remarkably, the concentrations of  $Mg^{2+}$  in commonly  
306 used culture media, like HEPES-buffered Tyrode's lactate solution (TL-HEPES), may be high  
307 enough to partially obstruct channels such as the TRPM7 channel (Ozil et al., 2017).

308

309 In support of a possible role of this channel, it has recently been shown that fertilization-  
310 induced embryo development in several species is increased in media with lower  
311 concentrations of  $Mg^{2+}$  (Herrick et al., 2015), and that sperm-initiated oscillations were  
312 increased when measurements were performed in the presence of low levels of extracellular  
313  $Mg^{2+}$  (Ozil et al., 2017). To determine if indeed extracellular  $Mg^{2+}$  ( $[Mg^{2+}]_o$ ) was affecting  $Ca^{2+}$   
314 oscillations, we monitored oscillations after PLC $\zeta$  cRNA injection in  $Mg^{2+}$ -containing and  $Mg^{2+}$ -  
315 free environments. It is worth noting, that changes in  $[Mg^{2+}]_o$  concentrations in unfertilized

316 WT and dKO eggs had no effect on the eggs' basal  $\text{Ca}^{2+}$  levels (data not shown). Nevertheless,  
317 we observed that the absence of  $\text{Mg}^{2+}$  greatly increased the frequency of oscillations, and  
318 bringing  $\text{Mg}^{2+}$  to concentrations found in most commercial media slowed the oscillations,  
319 which in some cases ceased to continue (Fig. 7A-B). We observed the same effects in dKO GV  
320 oocytes after inducing spontaneous oscillations with  $\text{SrCl}_2$  (Supplementary Fig. S6A-B), which  
321 suggests that TRPM7-like channels are expressed in oocytes and eggs of dKO mice.  
322

## DISCUSSION

323  $\text{Ca}_v3.2$  channels were one of the first channels identified via molecular biology and  
324 electrophysiology in mouse eggs. Later, TRPV3 channels were identified using  
325 electrophysiology and KO animals (Peres, 1986; Peres, 1987; Kang et al., 2007; Bernhardt et  
326 al., 2015; Carvacho et al., 2013). Both channels are expressed in maturing oocytes, although  
327 definitive characterization of their expression and function during this process requires  
328 further investigation. Here, we studied the extent to which these channels are responsible for  
329 maintaining and increasing  $[\text{Ca}^{2+}]_{\text{ER}}$  during maturation as well as their role in fertilization.  
330 Previously, it has been shown that mouse oocytes null for only TRPV3 (Carvacho et al., 2013)  
331 or only  $\text{Ca}_v3.2$  (Bernhardt et al., 2015) do not display major defects on fertilization or embryo  
332 developmental competency and are neither necessary nor sufficient for  $[\text{Ca}^{2+}]_i$  oscillations.  
333 Nevertheless, given their prominent expression in oocytes and distinct expression patterns,  
334 we speculated their simultaneous elimination might have consequences in  $\text{Ca}^{2+}$  homeostasis  
335 and/or fertility. Our results show that their simultaneous absence greatly impacts  $\text{Ca}^{2+}$   
336 homeostasis in oocytes and eggs and compromises the ability to initiate regularly spaced,  
337 frequent  $\text{Ca}^{2+}$  transients after fertilization. Nevertheless, while diminished,  $[\text{Ca}^{2+}]_i$  oscillations  
338 are sustained, rendering dKO eggs a perfect platform to: 1) gain insights into the regulation  
339 of  $\text{Ca}^{2+}$  homeostasis during maturation and fertilization, and 2) assess the presence of other  
340 fundamental channels responsible for the totality of  $\text{Ca}^{2+}$  in oocytes and eggs.

341

342 Mouse oocytes and eggs contain a host of other potential sources of  $\text{Ca}^{2+}$  influx. Notably,  
343 another TRP family member, TRPM7, has been reported to be imperative for embryonic  
344 development (Jin et al., 2008). We recently demonstrated expression of TRPM7 in GV oocytes  
345 and MII eggs (Carvacho et al., 2016), though further experiments are required to clarify its

346 function in oocytes and during pre-implantation development. It is nevertheless well known  
347 that TRPM7 is highly permeable to other divalent cations such as  $Zn^{2+}$  and  $Mg^{2+}$ , and in fact  
348  $Mg^{2+}$  homeostasis in the cell is largely mediated by TRPM7 (Bates-Withers et al., 2011). Thus,  
349 in addition to these ions,  $Ca^{2+}$  might also be permeating through this channel during  
350 development. Remarkably,  $[Mg^{2+}]_o$  also acts as an antagonist of TRPV3 (Luo et al., 2012).  
351 Therefore, identification of the role of each channel would require studying  $Ca^{2+}$  responses in  
352 individual KO models as well as in models where several channels are eliminated.

353

#### 354 dKO Fertility

355  $Ca_v3.2$  and TRPV3 channel function, singly or in combination, do not appear to be necessary  
356 for oocyte maturation, as a normal number of oocytes complete maturation and reach the  
357 MII stage in single KO females (Bernhardt et al., 2015; Carvacho et al., 2013), as well as our  
358 own results with dKO females in this study. Remarkably, we found a substantial decline in the  
359 fertility of dKO females, especially after the third litter, which also coincides with parturitions  
360 occurring at greater, though inconsistent, intervals. It is presently unclear what the underlying  
361 cellular or molecular reasons that progressively compromise fertility could be, as these  
362 defects are not observed in single KO lines. Our results show that the single KO is not enough  
363 to disrupt  $Ca^{2+}$  homeostasis, possibly because another channel(s) can effectively compensate.  
364 Simultaneous deletion, however, causes a significant effect, which might undermine embryo  
365 development. Future studies should examine histological sections of the ovaries at different  
366 ages, as well as collection of embryos following timed mating to elucidate the factor(s)  
367 compromising fertility in this model.

368

369 Ca<sup>2+</sup> Store Content in Eggs of dKO Mice

370 Using Ca<sup>2+</sup>-imaging measurements after addition of Ca<sup>2+</sup> ionophore and/or TG, we found that  
371 dKO eggs showed vastly reduced [Ca<sup>2+</sup>]<sub>ER</sub> store content over WT eggs. Moreover, oocytes and  
372 eggs from mice null for a single channel showed only minor effects on this parameter  
373 suggesting that these channel(s) could be compensating for each other's absence.  
374 Importantly, the stores of dKO eggs were not empty, which suggests they are still capable of  
375 Ca<sup>2+</sup> influx; as previously noted, TRPM7 is a candidate to mediate this influx. Further, the  
376 expression of TRPM7 might be augmented in dKO eggs, as suggested by the higher frequency  
377 of transients in the Mg<sup>2+</sup>-free experiments and the larger current in these eggs (data not  
378 shown).

379

380 Sr<sup>2+</sup> Responses in dKO Oocytes and Eggs

381 Sr<sup>2+</sup> influx in MII eggs is mediated by TRPV3 (Carvacho et al., 2013), but not in GV oocytes, as  
382 Sr<sup>2+</sup> oscillations are still observed in GV oocytes of V3KO mice (Carvacho et al., 2016).  
383 Research showed that Ca<sub>v</sub> channels mediate divalent cation influx, including Sr<sup>2+</sup>, in cardiac  
384 Purkinje cells (Hirano et al., 1989a; Hirano et al., 1989b), and our results here with dKO mice  
385 confirm these results, as Sr<sup>2+</sup> oscillations were greatly reduced in GV oocytes of dKO mice. We  
386 found that even in dKO GV oocytes, Sr<sup>2+</sup> influx could be promoted if [Mg<sup>2+</sup>]<sub>o</sub> was reduced or  
387 removed. Thus, TRPM7 might be the channel that mediates the residual influx of Sr<sup>2+</sup> in dKO  
388 oocytes (Fig. 8). Additionally, our data suggests that the mechanism that favors Sr<sup>2+</sup> influx  
389 changes during maturation, since dKO GV oocytes can still conduct some Sr<sup>2+</sup>, whereas MII  
390 dKO eggs cannot. Given that we show that Sr<sup>2+</sup> mostly permeates through Ca<sub>v</sub> channels in GV  
391 oocytes, and where this is not the case in MII eggs, our data suggests that during maturation

392  $Ca_v$  channels become progressively nonfunctional; how this is accomplished, though, may  
393 offer important insights into the regulation of  $Ca^{2+}$  homeostasis in oocytes.

394

#### 395 $Ca^{2+}$ Oscillations Post-Activation and -Fertilization

396 Fewer dKO eggs showed  $Ca^{2+}$  oscillations in response to a variety of stimuli, and those that  
397 initiated oscillations showed a decreased frequency (Fig. 8). In all these cases, the persistence  
398 of the oscillations also seemed shortened. The mechanism whereby the absence of these  
399 channels undermines the mounting of robust  $[Ca^{2+}]_i$  responses is unknown, but it might be  
400 that the reduced  $Ca^{2+}$  influx that causes slower refilling of the stores impairs the periodicity  
401 of the oscillations (Wakai et al., 2013). It has been proposed that intra-store  $Ca^{2+}$  levels  
402 sensitize the ER's  $IP_3R1s$  to the prevalent environmental  $[IP_3]$ , thus promoting  $Ca^{2+}$  release  
403 through this receptor (Taylor and Tovey, 2010). Therefore, the longer time needed to fill the  
404 stores to reach this threshold, the wider the intervals between rises.

405

406 Alternatively, the rate of refilling could influence the frequency of oscillations because the  
407  $[Ca^{2+}]_{ER}$  level at which  $Ca^{2+}$  “leaks out” into the ooplasm, where it activates the catalytic activity  
408 of PLC $\zeta$  (Sanders et al., 2018) leading to a quick increase in  $IP_3$  levels and  $[Ca^{2+}]_i$  release, is  
409 slowed in the dKO eggs. This assertion seems to be supported by the finding that while the  
410 interval between  $Ca^{2+}$  rises is increased, the parameters of individual rises, for example the  
411 rate of rise of the third peak, does not appear different between WT and dKO eggs. These  
412 results suggest that the activation of PLC $\zeta$  by the increasing concentrations of cytosolic  $Ca^{2+}$   
413 is similar between WT and dKO eggs. Therefore, what we interpret to be different in dKO eggs  
414 is the slower influx of  $Ca^{2+}$  that delays the sensitization of  $IP_3R1s$  and/or stimulation of PLC $\zeta$   
415 activity, in effect reducing the frequency of oscillations. Regardless of the specific



416 mechanisms, our results are the first to show – without pharmacological manipulation,  
417 molecular overexpression, or abnormal concentrations of extracellular  $\text{Ca}^{2+}$  – that stimulated  
418  $\text{Ca}^{2+}$  influx following sperm entry is a critical element in “setting the pace” of the  $\text{Ca}^{2+}$   
419 oscillations during mammalian fertilization.

420

#### 421 Functional Role of TRPV3 and $\text{Ca}_v3.2$ in Mouse Oocytes and Eggs

422 Given that oscillations persist in eggs of the dKO mice, a question that arises is why these  
423 channels are present in oocytes and eggs. In the case of  $\text{Ca}_v3.2$  channels, which are voltage-  
424 gated channels, the question is very relevant, as the mouse egg, a non-excitabile cell, and in  
425 contrast to invertebrate species, experiences only a small change in membrane potential  
426 during fertilization (Jaffe and Cross, 1984; Igusa et al., 1983). Moreover, as mentioned,  $\text{Ca}_v3.2$ -  
427 like currents have been measured in GV oocytes (Peres, 1986) and eggs (Peres, 1986; Day et  
428 al., 1998; Bernhardt et al., 2015); although at the reigning resting membrane potential in eggs  
429 of -30 to -40 mV (Peres, 1986), they are largely inactive. Nevertheless, a portion of the  
430 channels may display persistent inward currents at low voltages, referred to as “window  
431 currents” (Igusa et al., 1983). These currents have been detected in several cell types at or  
432 near to a membrane potential, comparable to the resting potential of unfertilized mouse  
433 oocytes and eggs (Bernhardt et al., 2015). Such a mechanism may be evident in the negative  
434 reversal potential observed in our dKO  $\text{Ca}_v$  recordings, which might reflect the lack of  
435 sufficient ions flowing across the membrane since the two main  $\text{Ca}^{2+}$  influx channels are  
436 missing, and the third purported channel, TRPM7, is blocked by high concentrations of  $\text{Ca}^{2+}$   
437 (Li et al., 2006), in which our recordings are performed (see Materials and Methods).

438

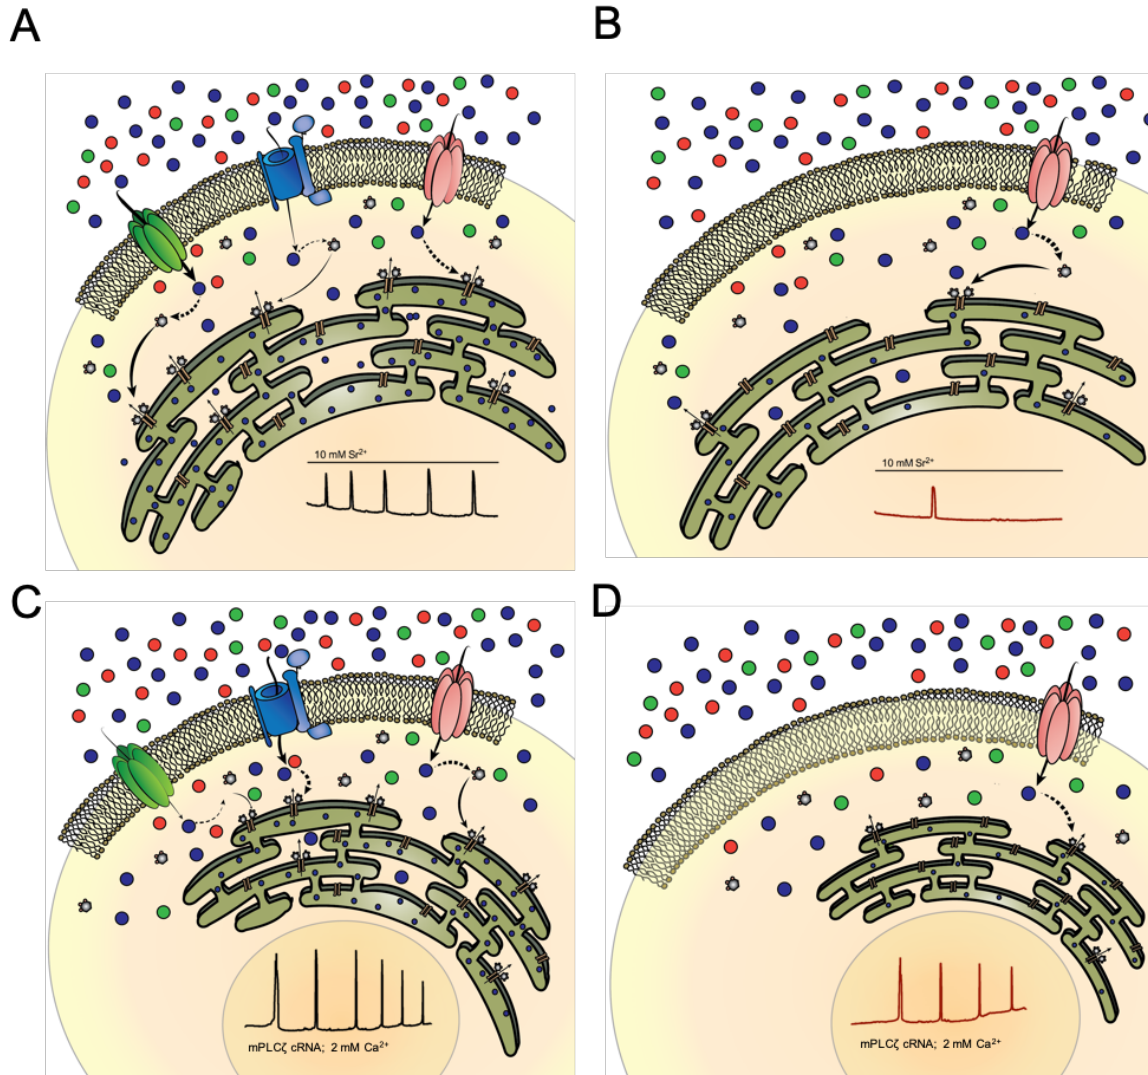

**Figure 8. Divalent cation homeostasis is affected in dKO oocytes and eggs.**

A-B: Model GV oocyte expressing TRPV3 (green channel),  $Ca_v3.2$  (blue channel), and TRPM7 (red channel). A: WT oocyte shows normal divalent cation influx as indicated by weights of arrows, and normal pattern of  $SrCl_2$ -induced oscillations. B: dKO GV oocyte exhibiting less  $Ca^{2+}$  influx, diminished pattern of  $SrCl_2$ -induced oscillations, and thus decreased  $[Ca^{2+}]_{ER}$ . C-D: Model MII egg expressing TRPV3,  $Ca_v3.2$ , and TRPM7. C: WT egg displays normal calcium homeostasis and mounts a regular pattern of fertilization-induced  $Ca^{2+}$  oscillations (black trace). D: dKO egg displays infrequent oscillations due to decreased  $Ca^{2+}$  influx (red trace). Dashed arrows represent degree of sensitization on a secondary messenger ( $IP_3$ ). Solid arrows represent direct translocation of secondary messenger.  $Ca^{2+}$  ions (blue),  $Sr^{2+}$  ions (orange) and  $Mg^{2+}$  ions (green).

439

440 The role of TRPV3 also needs some re-examination, since *Trpv3*<sup>-/-</sup> eggs do not show changes  
441 in oscillation frequency post-fertilization; elimination of both channels has devastating effects  
442 on the eggs'  $Ca^{2+}$  store content and oscillations after fertilization. It is therefore plausible that

443 eggs have redundant, compensatory channel(s) that sustain(s) normal oscillations in the  
444 event of the loss of a single channel. It is also possible that there are undetermined  
445 endogenous modulators of TRPV3 and Ca<sub>v</sub>3.2 that are present in oocytes and eggs, and how  
446 their activity is regulated will be the subject of future studies. Finally, although the exact  
447 function(s) of these channels remain(s) unknown, we provide evidence that they contribute  
448 to the maintenance of Ca<sup>2+</sup> homeostasis pre- and post-fertilization. Gaining insight into the  
449 mechanism of Ca<sup>2+</sup> influx during maturation and fertilization will aid in the generation of  
450 conditions that improve developmental competence especially of *in vitro* matured oocytes.  
451 Moreover, the identification of these channels as well as the development of specific channel  
452 blockers will contribute to the establishment of novel, non-hormonal methods of  
453 contraception to be used in humans, or to prevent the uncontrolled population growth of  
454 wild life species.  
455

## MATERIALS & METHODS

### 456 Animal Husbandry

457 WT and dKO mice were generated by breeding a female *Trpv3*<sup>-/-</sup> mouse (Cheng et al., 2010)  
458 (a generous gift from Dr. H. Xu, University of Michigan) with a mixed C57BL/6J and  
459 129/SvEvTac background to a male *Cacna1h*<sup>-/-</sup> mouse (Jackson Laboratories, Bar Harbor, ME)  
460 with a B6;129-Cacna1h<sup>tm1Kcam</sup>/J background to generate F1 offspring heterozygous for *Trpv3*  
461 *and Cacna1h* (dHET; +/-). Initial dKO and WT mice were obtained by intercross of dHETs and  
462 maintained on a mixed C57BL/6 and 129/SvEvTac background. Ear clips from offspring were  
463 collected prior to weaning, and confirmation of genotype was performed after most  
464 experiments.

465

### 466 Oocyte Collection

467 Fully mature GV oocytes were collected from the ovaries of six-to-ten-week-old females that  
468 were superovulated by intraperitoneal (i.p.) injection of 5 IU pregnant mare serum  
469 gonadotropin (PMSG, Calbiochem, EMD Biosciences). GVs were collected and recovered into  
470 a HEPES-buffered Tyrode's Lactate (TL-HEPES) solution supplemented with 5% heat-treated  
471 fetal calf serum (FCS, Gibco) and 100  $\mu$ M IBMX to block spontaneous progression of meiosis.  
472 In-vivo matured metaphase-II (MII) eggs were collected by i.p. injection of 5 IU human  
473 chorionic gonadotropin (hCG, Calbiochem, EMD Biosciences) 46-48 hours post PMSG  
474 stimulation. Ovulated, MII-arrested eggs were obtained by rupturing the oviducts with fine  
475 forceps in TL-HEPES solution supplemented 5% FCS 12-14 hours post hCG stimulation.  
476 Cumulus cells were removed using 0.1% bovine testes hyaluronidase (Sigma, St. Louis, MO)  
477 and gentle aspiration through a pipette. All procedures were performed according to research

478 animal protocols approved by the University of Massachusetts Institutional Animal Care and  
479 Use Committee.

480

#### 481 Genotyping/PCR Analysis

482 Mice were identified and genotyped using tissue from an ear clip, which was collected and  
483 lysed using tail lysis buffer (Tris pH 8.8 [50mM], EDTA pH 8 [1mM], Tween 20 [0.5%],  
484 proteinase K [0.3 mg/mL]). Genomic DNA was then stored at -20°C for later use in PCR  
485 analysis. Mouse genotyping was routinely performed using PCR analysis followed by  
486 fractionation on a 1.2% agarose gel. For *Trpv3*, F7622, 5'-GACATGCCATGCAAAAACTACCA-3'  
487 and R28432, 5'-GTCTGTTATATGTACAGGCATGG-3' were used. The *Trpv3* WT and mutant  
488 alleles yielded products of 800 bp and 300 bp, respectively. For *Cacna1h*, 11395, 5'-  
489 ATCAAGGGCTTCCACAGGGTA-3', 11396, 5'-CATCTCAGGGCCTCTGGACCAC-3', and  
490 oIMR2063, 5'-GCTAAAGCGCATGCTCCAGACTG-3' were used. All primers were purchased from  
491 IDT Technologies (Coralville, IA). The *Cacna1h* WT and mutant alleles yielded products of 480  
492 bp and 330 bp, respectively.

493

#### 494 Calcium [Ca<sup>2+</sup>]<sub>i</sub> Imaging and Reagents

495 [Ca<sup>2+</sup>]<sub>i</sub> monitoring was performed as previously reported by our laboratory (Kurokawa et al.,  
496 2007). Briefly, eggs were loaded with the Ca<sup>2+</sup> sensitive dye Fura-2-acetoxymethyl ester (Fura-  
497 2AM, Molecular Probes; Invitrogen). Oocytes/eggs were loaded with 1.25μM Fura-2AM  
498 supplemented with 0.02% pluronic acid (Molecular Probes) for 20 min at room temperature.  
499 To estimate [Ca<sup>2+</sup>]<sub>i</sub>, oocytes/eggs were thoroughly washed and immobilized on a glass bottom  
500 monitoring dish (Mat-Tek Corp., Ashland, MA) submersed in FCS-free TL-HEPES under mineral  
501 oil. Oocytes/eggs were monitored under a Nikon Diaphot microscope outfitted for

502 fluorescence measurements. The objective used was a 20X Nikon Fluor. The excitation lamp  
503 was a 75 W Xenon lamp, and emitted light >510 nm was collected by a cooled Photometrics  
504 SenSys CCD camera (Roper Scientific, Tucson, AZ) using NIS-Elements software (Nikon,  
505 Melville, NY). Oocytes/eggs were alternatively illuminated with 340 nm and 380 nm light by  
506 a MAC5000 filter wheel/shutter control box (Ludl Electronic Productions Ltd.), and  
507 fluorescence was captured every 20 s.

508

509 For experiments where the concentration of  $Mg^{2+}$  was changed, two blunt capillaries were  
510 secured to micromanipulators on either side of the glass bottom dish and inserted into the  
511 monitoring drop. One capillary was attached to a perfusion manifold via polyethylene tubing  
512 leading to open syringes filled with either normal,  $Mg^{2+}$  containing media, or  $Mg^{2+}$ -free media.  
513 The other capillary was connected via polyethylene tubing to a closed syringe that acted as a  
514 manual vacuum when suction was applied with the plunger. Media was flowed in a slow,  
515 laminar fashion over the eggs during fluorescence intervals, while suction was simultaneously  
516 applied to change the concentration of  $Mg^{2+}$ . Complete perfusion lasted about 2 min, and  
517 monitoring was continuous throughout the process.

518 For experiments using thimerosal, thimerosal (sodium ethylmercurithiosalicylate; Sigma) was  
519 prepared fresh daily by diluting it in TL-HEPES containing 2 mM  $CaCl_2$ . Monitoring was  
520 performed in  $Ca^{2+}$ -containing TL-HEPES without FCS and thimerosal was added after 5-7 min  
521 of baseline recording.

522

523 To examine the role of  $Ca^{2+}$  influx in refilling  $[Ca^{2+}]_{ER}$ , we monitored eggs in nominal  $Ca^{2+}$ -free,  
524 FCS-free TL HEPES. After a 5-8-min baseline recording,  $[Ca^{2+}]_{ER}$  levels were assessed by the  
525 addition of 10 $\mu$ M Thapsigargin (TG; Calbiochem, San Diego, CA), an inhibitor of the

526 sarcoendoplasmic reticulum  $\text{Ca}^{2+}$ -ATPase (SERCA) pump, which induced a  $\text{Ca}^{2+}$  leak via an  
527 unknown mechanism. TG-induced  $\text{Ca}^{2+}$  rises were regarded as  $[\text{Ca}^{2+}]_{\text{ER}}$  content that could be  
528 estimated from the area under the curve of the  $[\text{Ca}^{2+}]_{\text{i}}$  rise using Prism (GraphPad Software,  
529 La Jolla, CA). When  $[\text{Ca}^{2+}]_{\text{i}}$  returned to near baseline values,  $\sim 35$  min after TG addition, 2-5  
530 mM  $\text{CaCl}_2$  was added to the medium, and the amplitude of the  $[\text{Ca}^{2+}]_{\text{i}}$  rise caused by the  
531 addition was used to estimate  $\text{Ca}^{2+}$  influx. In other experiments, the addition of  $2.5\mu\text{M}$   
532 Ionomycin (IO), a  $\text{Ca}^{2+}$  ionophore, was used to assess total store content of the egg. IO-  
533 induced  $\text{Ca}^{2+}$  rises were regarded as the total  $[\text{Ca}^{2+}]_{\text{i}}$  that could be estimated from the area  
534 under the curve of the  $[\text{Ca}^{2+}]_{\text{i}}$  rise using Prism.

#### 535 FRET and Calcium Imaging

536 To estimate the relative concentrations of Camui, the emissions of CFP, YFP and ratio imaging  
537 of the Camui (YFP/CFP) were monitored using a CFP excitation filter, dichroic beam splitter,  
538 CFP and YFP emission filters (Chroma technology, Rockingham, VT; ET436/20X, 89007bs,  
539 ET480/40m and ET535/30m). Eggs were then attached on glass-bottom dishes and placed on  
540 the stage of an inverted microscope. CFP and YFP intensities were collected every 20 second  
541 by a cooled Photometrics SenSys CCD camera and intensities compared between groups  
542 under examination. The rotation of excitation and emission filter wheels was controlled using  
543 the MAC5000 filter wheel/shutter control box (Ludl) and NIS-elements software. Imaging was  
544 performed on an inverted epifluorescence microscope using a 20x objective.

545

#### 546 Electrophysiology

547 Whole-cell currents were measured at  $22-24^\circ\text{C}$  using an Axopatch 200B amplifier digitized at  
548 10 kHz (Digidata 1440A) and filtered at 5 kHz. Electrophysiology recordings were performed  
549 on the same day of egg isolation up to 8 h post-collection. Cumulus-free superovulated eggs



550 were maintained in KSOM<sub>AA</sub> at 37°C and 5% CO<sub>2</sub>. Shortly before measurement, eggs were  
551 aspirated briefly in acid Tyrode's solution (pH 2.5) to remove the zona pellucidae. Data were  
552 analyzed using Clampfit (Molecular Devices) and Graphpad Prism. Pipettes of 1-3MΩ  
553 resistance were made from glass capillaries (593600, A-M Systems, CA), and typical seals of  
554 1-4 MΩ were achieved before breaking into eggs. Series resistance was compensated by 40-  
555 60%. The intracellular solution contained (in mM): 152 Cs-Methanesulfonate, 1 Cs-BAPTA, 10  
556 HEPES, 2 MgATP, 0.3 NaGTP, 8 NaCl, pH: 7.3 adjusted with CsOH. The external solution  
557 contained (in mM): 125 NaCl, 6 KCl, 20 CaCl<sub>2</sub>, 1.2 MgCl<sub>2</sub>, 20 HEPES-NaOH, pH: 7.4. The  
558 response to 2-APB and mibefradil were measured in external solution containing (in mM):  
559 140 NaCl, 10 HEPES, 10 glucose, 4 KCl, 1 MgCl<sub>2</sub>, 2 CaCl<sub>2</sub>. All voltages were corrected for  
560 calculated junction potentials present between the intracellular and external solutions before  
561 seal formation. TRPV3 currents were elicited by voltage ramps from -100 mV to 100 mV (600  
562 ms, every 2 s), in the presence of 2-APB. The holding potential was 0 mV. Ca<sub>v</sub>3.2 currents  
563 were elicited by 50 ms duration depolarization steps from -100 mV to 50 mV in 10 mV  
564 increments. The holding potential was -80 mV. For experiments using inhibitors, seals were  
565 obtained in external solution containing 20 mM CaCl<sub>2</sub> followed by equilibration in 2 mM CaCl<sub>2</sub>.  
566 Statistical analyses were performed using GraphPad Prism: t-test, paired, two-tailed p-value.

567

### 568 Parthenogenetic Activation

569 For TRPV3-mediated egg activation, oocytes/eggs were collected as described above in TL-  
570 HEPES supplemented with 5% FCS (and 100 μM IBMX for GV experiments). For Ca<sup>2+</sup>  
571 monitoring, oocytes/eggs were loaded with Fura-2AM, then immobilized to a glass-bottom  
572 monitoring dish (Mat-Tek Corp) under nominal Ca<sup>2+</sup>- and FCS-free TL-HEPES supplemented  
573 with 10mM SrCl<sub>2</sub> (and 100 μM IBMX for GV experiments) submersed in mineral oil. For



574 activation, eggs were incubated in 5% CO<sub>2</sub> at 37° C for 2 h in Ca<sup>2+</sup>-free Chatot, Ziomek, or  
575 Bavister (CZB; Chatot et al., 1989) medium supplemented with either 3 mg/mL BSA or 0.01%  
576 polyvinyl alcohol (PVA), and 10mM SrCl<sub>2</sub>. Eggs were then washed and transferred to  
577 potassium-supplemented simplex optimized medium with amino acids (KSOM<sup>AA</sup>), and  
578 cultured to the 2-cell stage. Eggs were evaluated at 5-6 h and 22-24 h post treatment under  
579 phase contrast microscopy. Activated eggs were classified according to the following criteria:  
580 (1) PN group, consisted of zygotes forming a single PN with first and second polar bodies (5 h  
581 post-treatment); (2) cleaved group; eggs undergoing immediate cleavage after 24 h. Eggs  
582 without 2<sup>nd</sup> polar bodies, PN formation, or those failing to cleave were considered as non-  
583 activated (MII egg). Fragmented eggs were excluded from analysis.

584

#### 585 Preparation of cRNAs and microinjections

586 The sequences encoding for Camui (generously gifted by Dr. Margaret Stratton, UMAss  
587 Amherst) and the full-length of mouse PLC $\zeta$  cDNA, a kind gift from Dr. K. Fukami (Tokyo  
588 University of Pharmacy and Life Science, Japan) were subcloned into a pcDNA6 vector  
589 (pcDNA6/Myc-His B; Invitrogen, Carlsbad, CA). Plasmids were linearized with a restriction  
590 enzyme downstream of the insert and cDNAs were *in vitro* transcribed using the T7 or SP6  
591 mMESAGE mMACHINE Kit as previously described (Ambion, Austin, TX) according to the  
592 promoter present in the construct. A Poly (A)-tail was added to the mRNAs using a Tailing Kit  
593 (Ambion) and poly(A)-tailed RNAs were eluted with RNAase-free water and stored in aliquots  
594 at -80 °C. Microinjections were performed as described previously (Lee *et al.*, 2016). cRNAs  
595 were centrifuged, and the top 1–2  $\mu$ l was used to prepare micro drops from which glass  
596 micropipettes were loaded by aspiration. cRNA were delivered into eggs by pneumatic  
597 pressure (PLI-100 picoinjector, Harvard Apparatus, Cambridge, MA). Each egg received 5–10

598 pl, which is approximately 1–3% of the total volume of the egg. Injected MII eggs were  
599 allowed for translation up to 4h in KSOM.

600

#### 601 Sperm Isolation

602 Spermatozoa for IVF procedures were obtained from 10-16-week-old male CD1 mice. The  
603 cauda epididymis of the sacrificed male was collected and sliced with scissors in 500 $\mu$ L of  
604 Toyoda, Yokoyama, Hosi (TYH) medium supplemented with 4 mg/mL bovine serum albumin  
605 (BSA; Sigma). The epididymis was incubated for 10-15 min at 37° C and 5% CO<sub>2</sub> in TYH after  
606 which they were removed, whereas sperm were incubated for an additional 1 h under the  
607 same conditions.

608

#### 609 IVF

610 For standard IVF, expanded cumulus-oocyte-complexes were released from the oviduct and  
611 directly transferred to 90 $\mu$ L drops of TYH medium supplemented with 4 mg/mL BSA that was  
612 equilibrated overnight in 5% CO<sub>2</sub> at 37° C, and 0.1-0.3 x 10<sup>6</sup> sperm/mL were added. Complexes  
613 were incubated for 1 h, washed of excess sperm, and loaded with Fura-2AM for Ca<sup>2+</sup>  
614 monitoring as described above. We also performed IVF in zona-free oocytes to detect [Ca<sup>2+</sup>]<sub>i</sub>  
615 responses in WT and dKO mice. Procedures were performed as previously described  
616 (Bernhardt et al., 2015).

617

#### 618 Statistical Analysis

619 Values from three or more experiments performed on different batches of eggs were used  
620 for evaluation of statistical significance. Prism (GraphPad Software) was used to perform the  
621 Student's *t*-test, one-way ANOVA, and graph productions. All data are presented as mean  $\pm$

622 SEM. Differences were considered significant at  $p < 0.05$  and denoted in bar graphs by the  
623 presence of asterisks.

624

#### 625 Chemical Reagents

626 Ionomycin, thapsigargin, PMSG, and hCG were purchased from Calbiochem (San Diego, CA).

627 Fura-2AM and pluronic acid were purchased from Invitrogen (Carlsbad, CA). All other  
628 chemicals were from Sigma (St Louis, MO), unless otherwise specified.

629

#### 630 Acknowledgements

631 These studies were supported in part by NIH grants to R. A. F. (HD051872, HD092499). We  
632 would like to thank Ms. Changli He for technical support, Dr. James Chambers for  
633 electrophysiology and microscopy support, and Ms. Cristina Parrella for assistance with  
634 maintaining a breeding colony of mice and preliminary culture studies of pre-implantation  
635 embryos.

636

637

- 639 Bates-Withers, C., Sah, R., & Clapham, D. E. (2011). TRPM7, the Mg(2+) inhibited channel  
640 and kinase. *Adv Exp Med Biol*, 704, 173-183. doi:10.1007/978-94-007-0265-3\_9
- 641 Bernhardt, M. L., Zhang, Y., Erxleben, C. F., Padilla-Banks, E., McDonough, C. E., Miao, Y.  
642 L., . . . Williams, C. J. (2015). CaV3.2 T-type channels mediate Ca(2)(+) entry during  
643 oocyte maturation and following fertilization. *J Cell Sci*, 128(23), 4442-4452.  
644 doi:10.1242/jcs.180026
- 645 Berridge, M. J. (2002). The endoplasmic reticulum: a multifunctional signaling organelle. *Cell*  
646 *Calcium*, 32(5-6), 235-249.
- 647 Berridge, M. J., Bootman, M. D., & Roderick, H. L. (2003). Calcium signalling: dynamics,  
648 homeostasis and remodelling. *Nat Rev Mol Cell Biol*, 4(7), 517-529.  
649 doi:10.1038/nrm1155
- 650 Berridge, M. J., Lipp, P., & Bootman, M. D. (2000). The versatility and universality of calcium  
651 signalling. *Nat Rev Mol Cell Biol*, 1(1), 11-21. doi:10.1038/35036035
- 652 Bootman, M. D., Collins, T. J., Peppiatt, C. M., Prothero, L. S., MacKenzie, L., De Smet, P., .  
653 . . Lipp, P. (2001). Calcium signalling--an overview. *Semin Cell Dev Biol*, 12(1), 3-10.  
654 doi:10.1006/scdb.2000.0211
- 655 Carvacho, I., Ardestani, G., Lee, H. C., McGarvey, K., Fissore, R. A., & Lykke-Hartmann, K.  
656 (2016). TRPM7-like channels are functionally expressed in oocytes and modulate post-  
657 fertilization embryo development in mouse. *Sci Rep*, 6, 34236. doi:10.1038/srep34236
- 658 Carvacho, I., Lee, H. C., Fissore, R. A., & Clapham, D. E. (2013). TRPV3 channels mediate  
659 strontium-induced mouse-egg activation. *Cell Rep*, 5(5), 1375-1386.  
660 doi:10.1016/j.celrep.2013.11.007
- 661 Chatot, C. L., Ziomek, C. A., Bavister, B. D., Lewis, J. L., & Torres, I. (1989). An improved  
662 culture medium supports development of random-bred 1-cell mouse embryos in vitro.  
663 *J Reprod Fertil*, 86(2), 679-688.
- 664 Cheek, T. R., McGuinness, O. M., Vincent, C., Moreton, R. B., Berridge, M. J., & Johnson,  
665 M. H. (1993). Fertilisation and thimerosal stimulate similar calcium spiking patterns in  
666 mouse oocytes but by separate mechanisms. *Development*, 119(1), 179-189.
- 667 Chen, C. C., Lamping, K. G., Nuno, D. W., Barresi, R., Prouty, S. J., Lavoie, J. L., . . .  
668 Campbell, K. P. (2003). Abnormal coronary function in mice deficient in alpha1H T-  
669 type Ca2+ channels. *Science*, 302(5649), 1416-1418. doi:10.1126/science.1089268
- 670 Cheng, X., Jin, J., Hu, L., Shen, D., Dong, X. P., Samie, M. A., . . . Xu, H. (2010). TRP channel  
671 regulates EGFR signaling in hair morphogenesis and skin barrier formation. *Cell*,  
672 141(2), 331-343. doi:10.1016/j.cell.2010.03.013
- 673 Chung, M. K., Lee, H., Mizuno, A., Suzuki, M., & Caterina, M. J. (2004). 2-  
674 aminoethoxydiphenyl borate activates and sensitizes the heat-gated ion channel  
675 TRPV3. *J Neurosci*, 24(22), 5177-5182. doi:10.1523/JNEUROSCI.0934-04.2004
- 676 Day, M. L., Johnson, M. H., & Cook, D. I. (1998). Cell cycle regulation of a T-type calcium  
677 current in early mouse embryos. *Pflugers Arch*, 436(6), 834-842.  
678 doi:10.1007/s004240050712
- 679 Deguchi, R., Shirakawa, H., Oda, S., Mohri, T., & Miyazaki, S. (2000). Spatiotemporal  
680 analysis of Ca(2+) waves in relation to the sperm entry site and animal-vegetal axis  
681 during Ca(2+) oscillations in fertilized mouse eggs. *Dev Biol*, 218(2), 299-313.  
682 doi:10.1006/dbio.1999.9573
- 683 Ducibella, T., Huneau, D., Angelichio, E., Xu, Z., Schultz, R. M., Kopf, G. S., . . . Ozil, J. P.  
684 (2002). Egg-to-embryo transition is driven by differential responses to Ca(2+)  
685 oscillation number. *Dev Biol*, 250(2), 280-291.

- 686 Gordo, A. C., Rodrigues, P., Kurokawa, M., Jellerette, T., Exley, G. E., Warner, C., & Fissore,  
687 R. (2002). Intracellular calcium oscillations signal apoptosis rather than activation in in  
688 vitro aged mouse eggs. *Biol Reprod*, *66*(6), 1828-1837.
- 689 Herrick, J. R., Strauss, K. J., Schneiderman, A., Rawlins, M., Stevens, J., Schoolcraft, W. B.,  
690 & Krisher, R. L. (2015). The beneficial effects of reduced magnesium during the  
691 oocyte-to-embryo transition are conserved in mice, domestic cats and humans. *Reprod*  
692 *Fertil Dev*, *27*(2), 323-331. doi:10.1071/RD13268
- 693 Hirano, Y., Fozzard, H. A., & January, C. T. (1989a). Characteristics of L- and T-type Ca<sup>2+</sup>  
694 currents in canine cardiac Purkinje cells. *Am J Physiol*, *256*(5 Pt 2), H1478-1492.  
695 doi:10.1152/ajpheart.1989.256.5.H1478
- 696 Hirano, Y., Fozzard, H. A., & January, C. T. (1989b). Inactivation properties of T-type calcium  
697 current in canine cardiac Purkinje cells. *Biophys J*, *56*(5), 1007-1016.  
698 doi:10.1016/S0006-3495(89)82745-6
- 699 Horner, V. L., & Wolfner, M. F. (2008). Transitioning from egg to embryo: triggers and  
700 mechanisms of egg activation. *Dev Dyn*, *237*(3), 527-544. doi:10.1002/dvdy.21454
- 701 Hu, H., Grandl, J., Bandell, M., Petrus, M., & Patapoutian, A. (2009). Two amino acid residues  
702 determine 2-APB sensitivity of the ion channels TRPV3 and TRPV4. *Proc Natl Acad*  
703 *Sci U S A*, *106*(5), 1626-1631. doi:10.1073/pnas.0812209106
- 704 Hu, H. Z., Gu, Q., Wang, C., Colton, C. K., Tang, J., Kinoshita-Kawada, M., . . . Zhu, M. X.  
705 (2004). 2-aminoethoxydiphenyl borate is a common activator of TRPV1, TRPV2, and  
706 TRPV3. *J Biol Chem*, *279*(34), 35741-35748. doi:10.1074/jbc.M404164200
- 707 Igusa, Y., Miyazaki, S., & Yamashita, N. (1983). Periodic hyperpolarizing responses in  
708 hamster and mouse eggs fertilized with mouse sperm. *J Physiol*, *340*, 633-647.
- 709 Jaffe, L. A., & Cross, N. L. (1984). Electrical properties of vertebrate oocyte membranes. *Biol*  
710 *Reprod*, *30*(1), 50-54.
- 711 Jin, J., Desai, B. N., Navarro, B., Donovan, A., Andrews, N. C., & Clapham, D. E. (2008).  
712 Deletion of *Trpm7* disrupts embryonic development and thymopoiesis without altering  
713 Mg<sup>2+</sup> homeostasis. *Science*, *322*(5902), 756-760. doi:10.1126/science.1163493
- 714 Jones, K. T., Carroll, J., & Whittingham, D. G. (1995). Ionomycin, thapsigargin, ryanodine,  
715 and sperm induced Ca<sup>2+</sup> release increase during meiotic maturation of mouse oocytes.  
716 *J Biol Chem*, *270*(12), 6671-6677.
- 717 Kang, D., Hur, C. G., Park, J. Y., Han, J., & Hong, S. G. (2007). Acetylcholine increases Ca<sup>2+</sup>  
718 influx by activation of CaMKII in mouse oocytes. *Biochem Biophys Res Commun*,  
719 *360*(2), 476-482. doi:10.1016/j.bbrc.2007.06.083
- 720 Kline, D., & Kline, J. T. (1992). Repetitive calcium transients and the role of calcium in  
721 exocytosis and cell cycle activation in the mouse egg. *Dev Biol*, *149*(1), 80-89.
- 722 Kurokawa, M., Yoon, S. Y., Alfandari, D., Fukami, K., Sato, K., & Fissore, R. A. (2007).  
723 Proteolytic processing of phospholipase C $\zeta$  and [Ca<sup>2+</sup>]<sub>i</sub> oscillations during  
724 mammalian fertilization. *Dev Biol*, *312*(1), 407-418. doi:10.1016/j.ydbio.2007.09.040
- 725 Lee, H. C., Yoon, S. Y., Lykke-Hartmann, K., Fissore, R. A., & Carvacho, I. (2016). TRPV3  
726 channels mediate Ca<sup>2+</sup>(+) influx induced by 2-APB in mouse eggs. *Cell Calcium*,  
727 *59*(1), 21-31. doi:10.1016/j.ceca.2015.12.001
- 728 Li, M., Jiang, J., & Yue, L. (2006). Functional characterization of homo- and heteromeric  
729 channel kinases TRPM6 and TRPM7. *J Gen Physiol*, *127*(5), 525-537.  
730 doi:10.1085/jgp.200609502
- 731 Maruyama, T., Kanaji, T., Nakade, S., Kanno, T., & Mikoshiba, K. (1997). 2APB, 2-  
732 aminoethoxydiphenyl borate, a membrane-penetrable modulator of Ins(1,4,5)P<sub>3</sub>-  
733 induced Ca<sup>2+</sup> release. *J Biochem*, *122*(3), 498-505.
- 734 Miyazaki, S., & Igusa, Y. (1981). Fertilization potential in golden hamster eggs consists of  
735 recurring hyperpolarizations. *Nature*, *290*(5808), 702-704.

- 736 Ozil, J. P., Markoulaki, S., Toth, S., Matson, S., Banrezes, B., Knott, J. G., . . . Ducibella, T.  
737 (2005). Egg activation events are regulated by the duration of a sustained  $[Ca^{2+}]_{cyt}$   
738 signal in the mouse. *Dev Biol*, 282(1), 39-54. doi:10.1016/j.ydbio.2005.02.035
- 739 Ozil, J. P., Sainte-Beuve, T., & Banrezes, B. (2017).  $[Mg^{2+}]_o/[Ca^{2+}]_o$  determines  $Ca^{2+}$   
740 response at fertilization: tuning of adult phenotype? *Reproduction*, 154(5), 675-693.  
741 doi:10.1530/REP-16-0057
- 742 Parrington, J., Davis, L. C., Galione, A., & Wessel, G. (2007). Flipping the switch: how a  
743 sperm activates the egg at fertilization. *Dev Dyn*, 236(8), 2027-2038.  
744 doi:10.1002/dvdy.21255
- 745 Parrington, J., Jones, K. T., Lai, A., & Swann, K. (1999). The soluble sperm factor that causes  
746  $Ca^{2+}$  release from sea-urchin (*Lytechinus pictus*) egg homogenates also triggers  $Ca^{2+}$   
747 oscillations after injection into mouse eggs. *Biochem J*, 341 ( Pt 1), 1-4.
- 748 Peres, A. (1986). Resting membrane potential and inward current properties of mouse ovarian  
749 oocytes and eggs. *Pflugers Arch*, 407(5), 534-540.
- 750 Peres, A. (1987). The calcium current of mouse egg measured in physiological calcium and  
751 temperature conditions. *J Physiol*, 391, 573-588.
- 752 Sanders, J. R., Ashley, B., Moon, A., Woolley, T. E., & Swann, K. (2018). PLCzeta Induced  
753  $Ca^{2+}$  Oscillations in Mouse Eggs Involve a Positive Feedback Cycle of  $Ca^{2+}$   
754 Induced InsP3 Formation From Cytoplasmic PIP2. *Front Cell Dev Biol*, 6, 36.  
755 doi:10.3389/fcell.2018.00036
- 756 Saunders, C. M., Larman, M. G., Parrington, J., Cox, L. J., Royse, J., Blayney, L. M., . . . Lai,  
757 F. A. (2002). PLC zeta: a sperm-specific trigger of  $Ca^{2+}$  oscillations in eggs and  
758 embryo development. *Development*, 129(15), 3533-3544.
- 759 Swann, K. (1991). Thimerosal causes calcium oscillations and sensitizes calcium-induced  
760 calcium release in unfertilized hamster eggs. *FEBS Lett*, 278(2), 175-178.
- 761 Swann, K., Saunders, C. M., Rogers, N. T., & Lai, F. A. (2006). PLCzeta(zeta): a sperm protein  
762 that triggers  $Ca^{2+}$  oscillations and egg activation in mammals. *Semin Cell Dev Biol*,  
763 17(2), 264-273. doi:10.1016/j.semcdb.2006.03.009
- 764 Taylor, C. W., & Tovey, S. C. (2010). IP(3) receptors: toward understanding their activation.  
765 *Cold Spring Harb Perspect Biol*, 2(12), a004010. doi:10.1101/cshperspect.a004010
- 766 Wakai, T., & Fissore, R. A. (2013).  $Ca^{2+}$  homeostasis and regulation of ER  $Ca^{2+}$  in  
767 mammalian oocytes/eggs. *Cell Calcium*, 53(1), 63-67. doi:10.1016/j.ceca.2012.11.010
- 768 Wakai, T., Vanderheyden, V., & Fissore, R. A. (2011).  $Ca^{2+}$  signaling during mammalian  
769 fertilization: requirements, players, and adaptations. *Cold Spring Harb Perspect Biol*,  
770 3(4). doi:10.1101/cshperspect.a006767
- 771 Wakai, T., Zhang, N., Vangheluwe, P., & Fissore, R. A. (2013). Regulation of endoplasmic  
772 reticulum  $Ca^{2+}$  oscillations in mammalian eggs. *J Cell Sci*, 126(Pt 24), 5714-5724.  
773 doi:10.1242/jcs.136549
- 774 Whitaker, M. (2006). Calcium at fertilization and in early development. *Physiol Rev*, 86(1),  
775 25-88. doi:10.1152/physrev.00023.2005
- 776 Wu, L. J., Sweet, T. B., & Clapham, D. E. (2010). International Union of Basic and Clinical  
777 Pharmacology. LXXVI. Current progress in the mammalian TRP ion channel family.  
778 *Pharmacol Rev*, 62(3), 381-404. doi:10.1124/pr.110.002725
- 779
